# Supplementary material for: HIV Alters Gap Junction-Mediated Intercellular Communication in Human Brain Pericytes
Source: PubMed Central journal article supplement (PMC5732912; doi:10.3389/fnmol.2017.00410), 2017-12-12
Supplement: Presentation_1.pdf [file Presentation_1.pdf]

*Supplementary Material*

**HIV alters gap junction-mediated intercellular communication in  
human brain pericytes**

**Hyung Joon Cho, Alyce Mei-Shiuan Kuo, Luc Bertrand, and Michal Toborek\***

**\* Correspondence:**

Dr. Michal Toborek,  
Department of Biochemistry and Molecular Biology,  
University of Miami School of Medicine  
Gautier Bldg., Room 528  
1011 NW 15th Street  
Miami, FL 33136  
Phone# 305-243-0230  
[mtoborek@med.miami.edu](mailto:mtoborek@med.miami.edu)

## 1 Supplementary Data

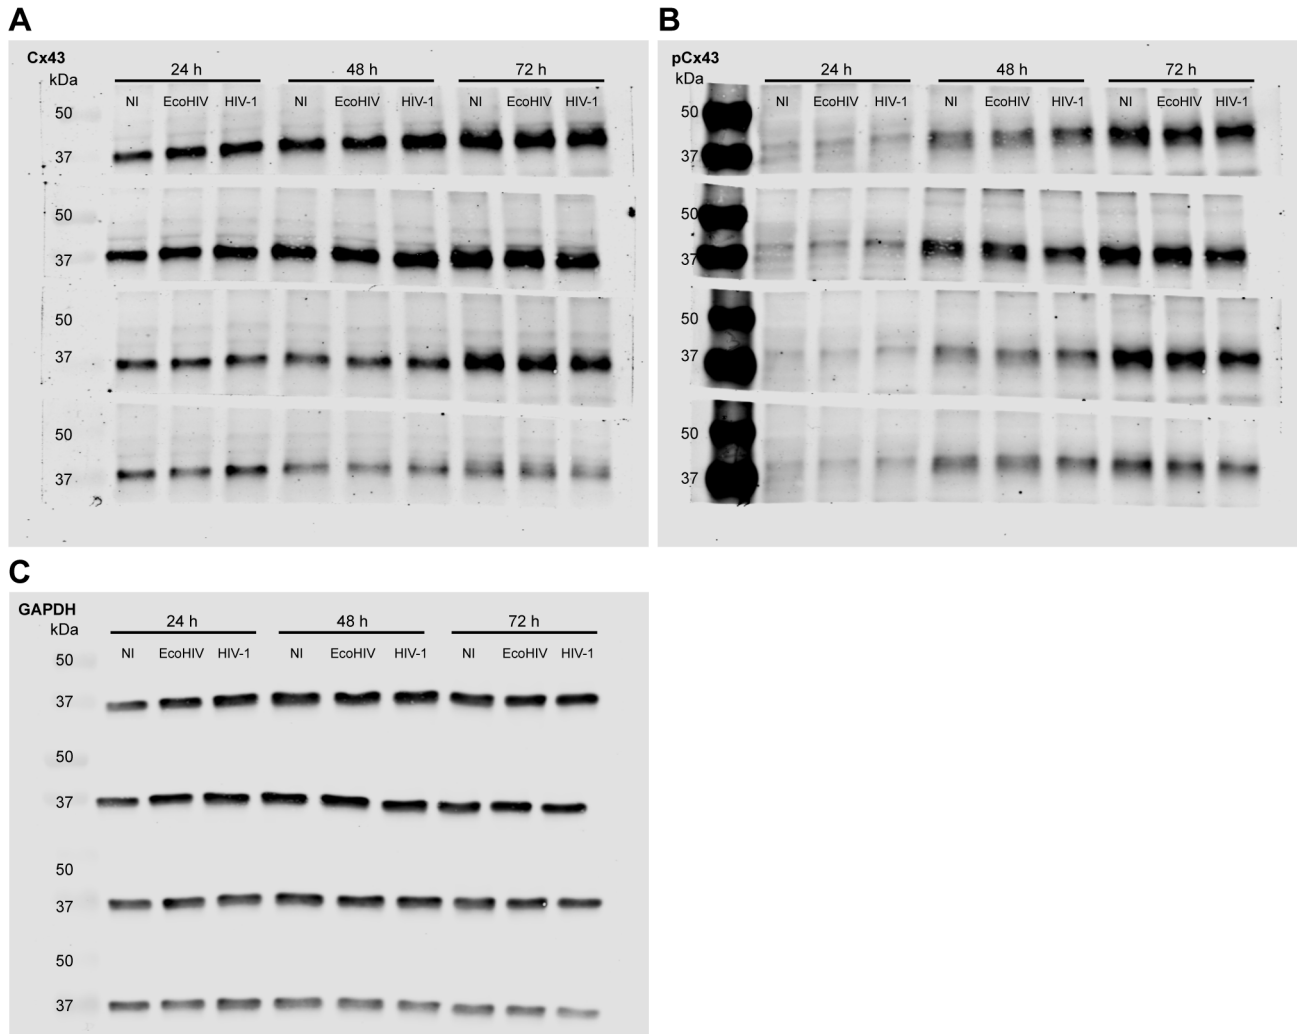

**Supplementary Figure S1.** A representative set (n=4) of full size blot used in Figure 2A to detect Cx43 (A), pCx43 (B), and GAPDH (C). A single blot was cut at molecular weight marker from 30 to 60 kDa to maximize immunoreactivity of primary antibodies for target proteins. NI: non-infected; Cx43: connexin 43; pCx43: phosphorylated Cx43.

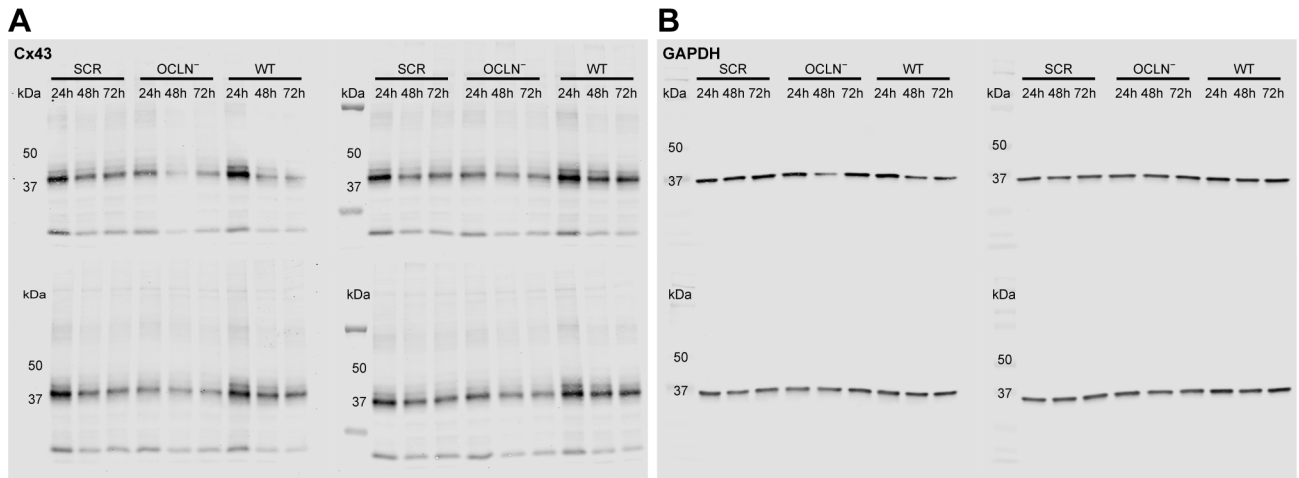

**Supplementary Figure S2.** A representative set (n=4) of full size blot used in Figure 5C to detect Cx43 (A) and GAPDH (B). SCR: scrambled; OCLN<sup>-/-</sup>: occludin depleted; WT: wild type.

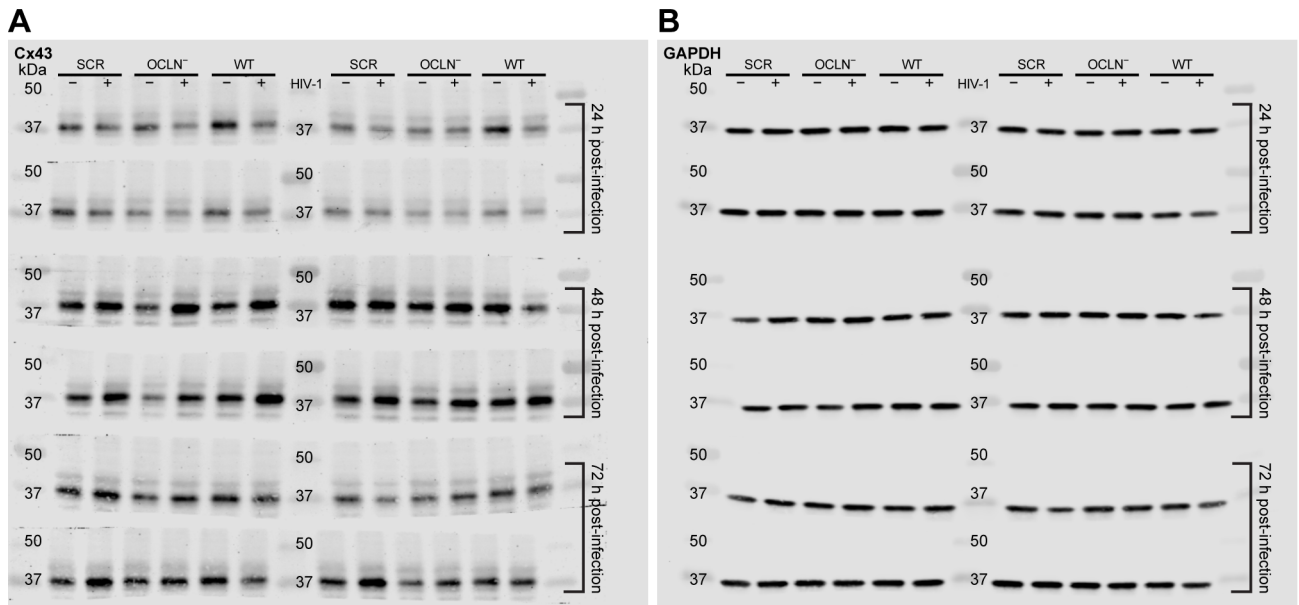

**Supplementary Figure S3.** A representative set (n=4) of full size blot used in Figure 5D to detect Cx43 (A) and GAPDH (B). A single blot was cut at molecular weight marker from 30 to 60 kDa to maximize immunoreactivity of primary antibodies for target proteins.
